# Supplementary material for: Paper-based platforms with coulometric readout for ascorbic acid determination in fruit juices
Source: Royal Society of Chemistry journal article supplement (doi:10.1039/d0an00477d), 2020-01-01
Supplement: d0an00477d1.pdf [file d0an00477d1.pdf]

## Supplementary Information

### Paper-based platforms with coulometric readout for ascorbic acid determination in fruit juices

Estefanía Núñez-Bajo, M. Teresa Fernández-Abedul\*

Departamento de Química Física y Analítica. Universidad de Oviedo. Asturias. Spain.

Phone: +34 (9)85102968. e-mail\*: [mtfernandez@uniovi.es](mailto:mtfernandez@uniovi.es)

#### Contents

- **Scheme S1.** Electrochemical process of ascorbic acid.
- **Scheme S2.** Enzymatic oxidation of ascorbic acid.
- **Figure S1.** (a) Cyclic voltammogram of AA in acetate buffer pH 3.5 and (b) linear sweep voltammograms of AA in buffer solutions of different pH.
- **Figure S2.** Influence of the carbon ink concentration on the sensitivity.
- **Figure S3** Chronoamperograms recorded in AA solutions in acetate buffer pH 3.5 with concentrations ranging from 0.05 to 1 mM and the corresponding calibration curve.
- **Figure S4.** Linear sweep voltammograms recorded in enzymatically-treated and untreated fruit juice samples.

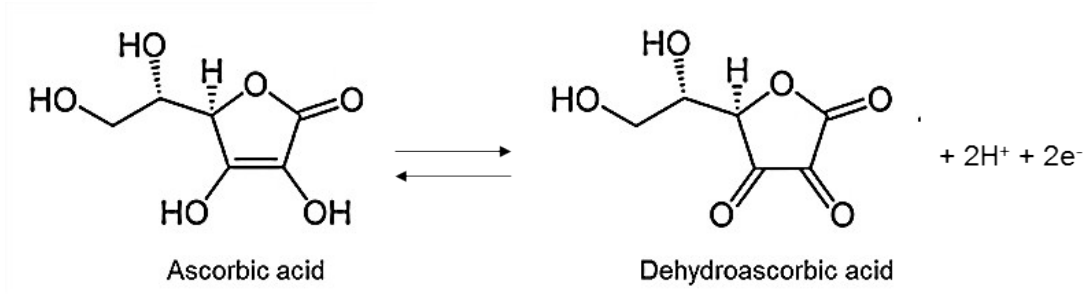

**Scheme 1.** Redox process of ascorbic acid.

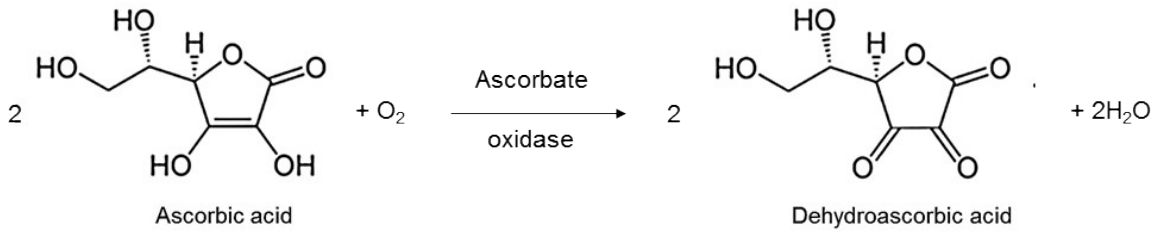

**Scheme 2.** Enzymatic oxidation of ascorbic acid.

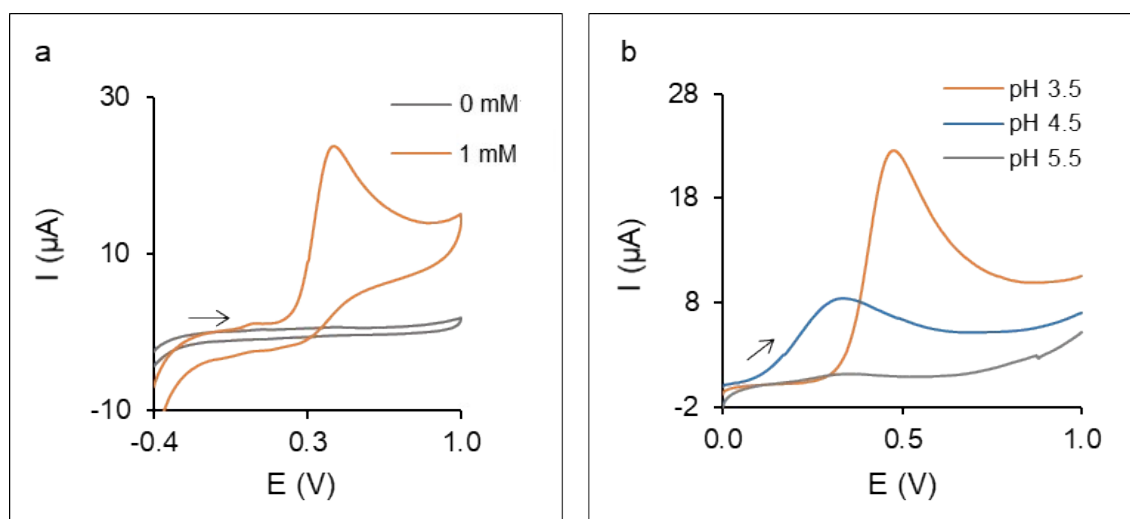

**Figure S1 (a)** Cyclic voltammograms recorded in acetate buffer pH 3.5 and 1.0 mM AA solutions using PCWEs on different paper substrates. Scan rate:  $100 \text{ mV}\cdot\text{s}^{-1}$ ; **(b)** Linear sweep voltammograms recorded in 1 mM AA solutions in acetate buffers of different pH. Scan rate:  $100 \text{ mV}\cdot\text{s}^{-1}$ .

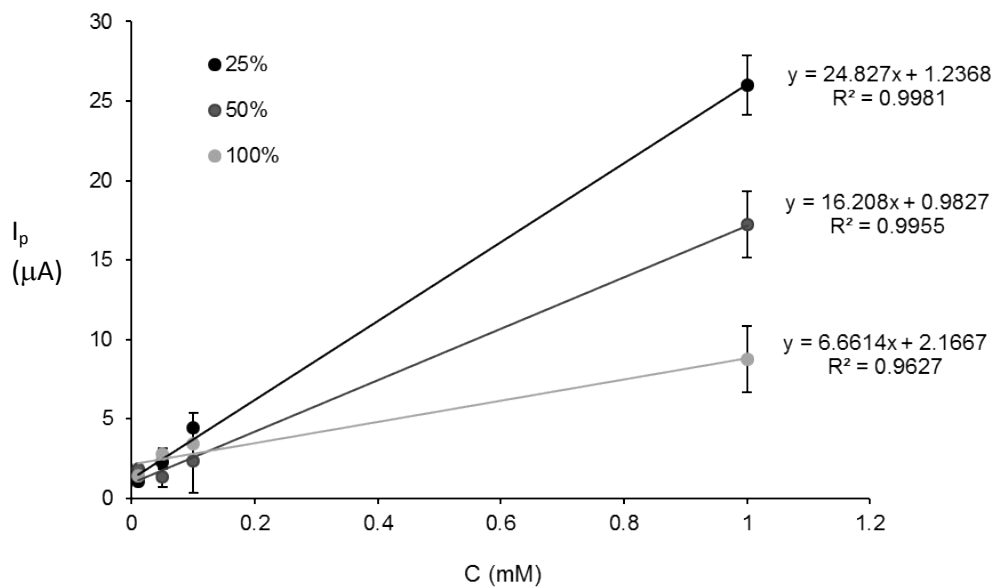

**Figure S2.** Influence of the carbon ink concentration on the sensitivity. Calibration curves corresponding to anodic peak currents obtained from linear sweep voltammograms recorded in AA solutions with concentrations in the 0.01-5  $\text{mM}$  range. Scan rate:  $100 \text{ mVs}^{-1}$ . Error bars correspond to the standard deviation of measurements recorded in different PCWEs ( $n=3$ ).

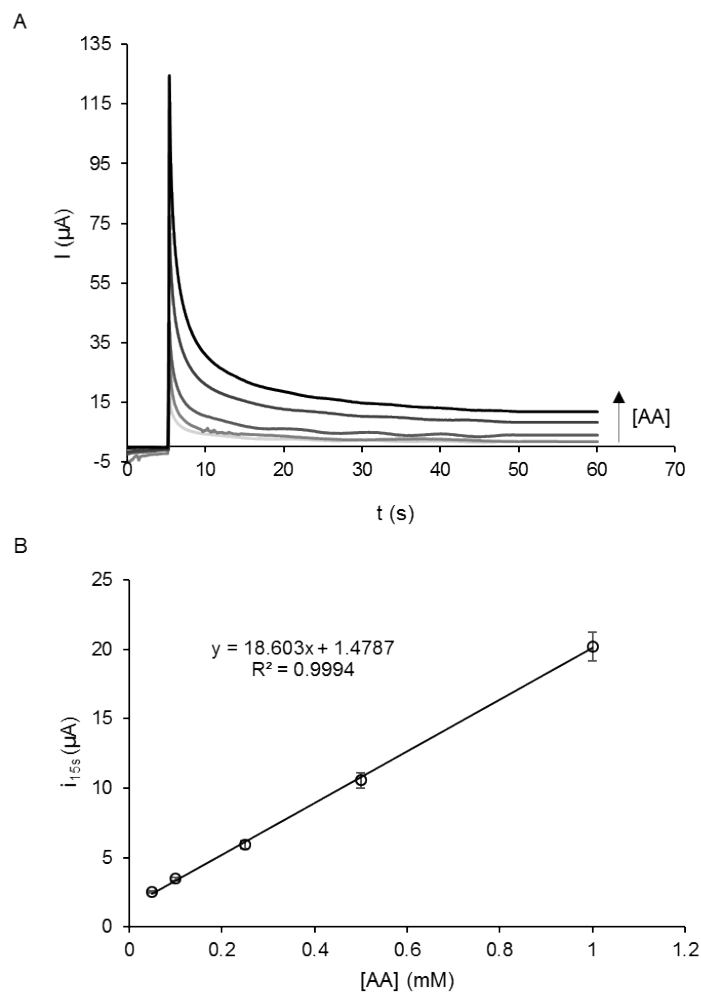

**Figure S3.** Chronoamperograms recorded in AA solutions in acetate buffer pH 3.5 with concentrations ranging from 0.05 to 1 mM **(A)** and calibration plot with currents measured at 15 s once the electrolysis has been initiated **(B)**. Error bars correspond to the standard deviation of measurements obtained in different PCWEs ( $n=3$ ).

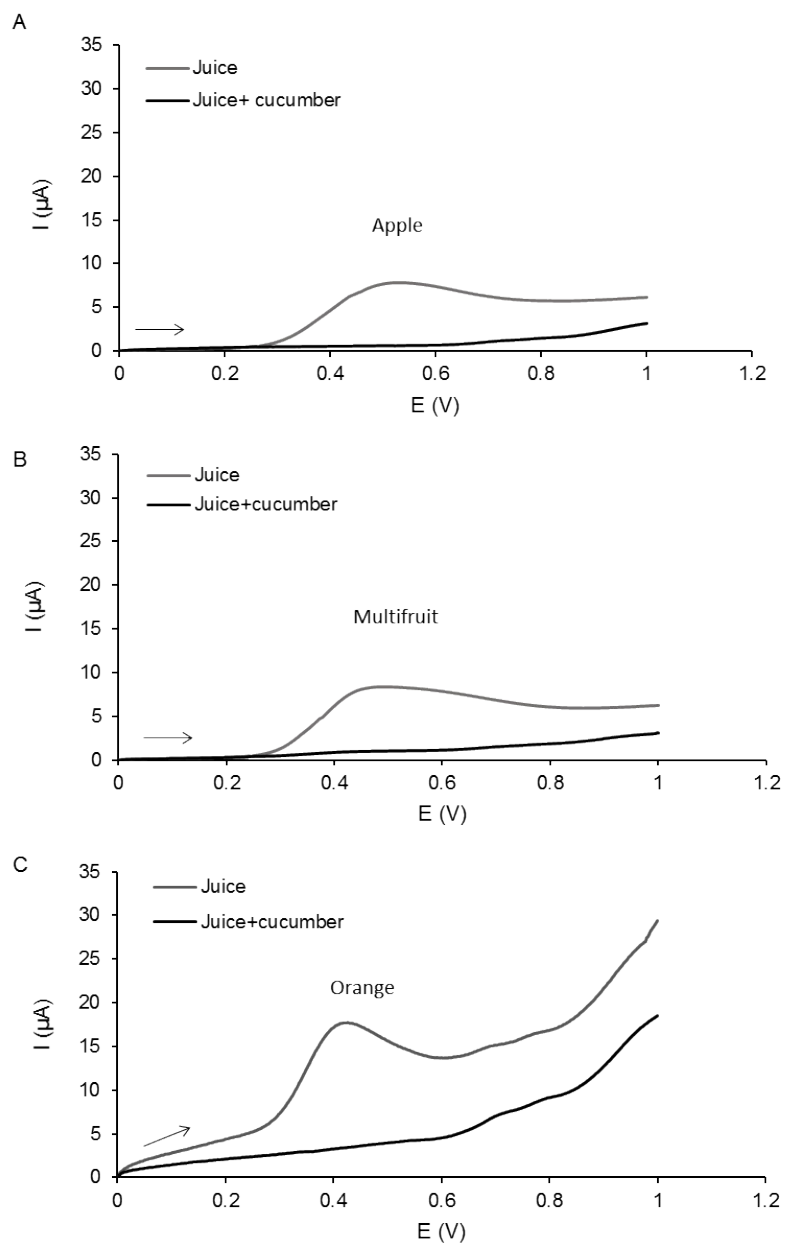

**Figure S4.** Linear sweep voltammograms recorded in enzymatically-treated and untreated apple (A), multifruit (B), and orange (C) juices in acetate buffer pH 5.0, diluted with acetate buffer pH 3.5. Scan rate:  $100 \text{ mV}\cdot\text{s}^{-1}$ .
